# Supplementary material for: Planar cell polarity-mediated induction of neural stem cell expansion during axolotl spinal cord regeneration
Source: eLife. 2015 Nov 14;4:e10230. doi: 10.7554/eLife.10230 (PMC4755742; doi:10.7554/eLife.10230)
Supplement: Figure 1—source data 1 — DOI: http://dx.doi.org/10.7554/eLife.10230.004 [file elife-10230-fig1-data1.xlsx]

## Sheet: Sheet1
This dataset results from differential gene expression analysis of NanoString transcript counts.
This dataset compares transcript counts in regenerating axolotl spinal cord samples (d1 and d6) and uninjured spinal cord samples (d0).
The fold change values in the SZ+PN versus CNT+RNT comparison are taken from Olivera-Martinez et al., 2014.
48-50 spinal cords were pooled to generate each of the three biological replicates analyzed per group.
The differential gene expression analysis was carried out using the DESeq package in R (http://www-huber.embl.de/users/anders/DESeq/)
p values indicate the results of negative binomial tests.
q values are adjusted p values using Benjamini-Hochberg method for multiple testing correction.
gene name	mean_d0	mean_d1	mean_d6	log2 (d1/d0)	pvalue_d1	qvalue_d1	log2 (d6/d0)	pvalue_d6	qvalue_d6	log2((SZ+PNT)/(CNT+RNT))
Add3	571.667	570	325	-0.00421225	0.979216	1	-0.814734	3.2e-08	6.87e-08	1.77
Apod	1	1	1	0	1	1	0	1	1	1.82
B3gat2	1	1	1	0	1	1	0	1	1	1.35
Bmpr1b	70.6667	32	33.3333	-1.14296	0.000142331	0.000435619	-1.08406	0.000287688	0.000447023	-2.27
Cdx2	1	2	1	1	0.70123	0.896509	0	1	1	3.94
Cdx4	7.33333	51.6667	768	2.81669	8.2e-09	5.92e-08	6.71049	1.68e-171	1.69e-169	5.1
Chic1	86.3333	125	188.667	0.533938	0.0142455	0.0293632	1.12785	3.52e-08	7.41e-08	1.61
Chst15	7.66667	8	2.33333	0.0614005	1	1	-1.71621	0.0855146	0.113644	4.94
Cited4	405.333	302.667	329	-0.421379	0.00778872	0.0180304	-0.301021	0.0487219	0.0674098	-1.87
Cldn1	12.3333	25.3333	13.3333	1.03847	0.0323156	0.0615825	0.112475	0.891724	0.989715	2.01
Cnot2	1	1	1	0	1	1	0	1	1	2.37
Col14a1	61	57.3333	46.3333	-0.0894351	0.766013	0.965588	-0.396759	0.284838	0.34661	-2.4
Col5a1	622.333	1001.67	1022.33	0.686643	1.99e-05	6.69e-05	0.716106	7.77e-08	1.6e-07	-2.02
Crabp1	3739.67	2820.33	956	-0.407044	0.000125705	0.000396757	-1.96783	4.24e-55	1.07e-53	-2.1
Crhbp	203	157.333	16.6667	-0.367655	0.0393207	0.0709177	-3.60644	3.08e-38	3.46e-37	4.3
Dach1	156.667	68	17.6667	-1.20409	2.49e-08	1.26e-07	-3.1486	5.39e-30	3.63e-29	1.36
Dbx2	50.6667	10	4	-2.34104	1.24e-08	7.38e-08	-3.66297	4.85e-14	1.32e-13	-3.3
Dhrs3	161.333	64.3333	48.3333	-1.32641	9.33e-10	7.85e-09	-1.73895	6.32e-14	1.68e-13	-3.67
Dlg1	200.667	154.333	112.333	-0.378751	0.0346702	0.0642982	-0.837015	1.64e-05	2.85e-05	1.49
Dusp4	158.667	158	66.3333	-0.00607451	0.986885	1	-1.25819	1.19e-08	2.62e-08	1.25
Efemp1	1	5.33333	2	2.41504	0.156515	0.247	1	0.695799	0.794041	-2.01
Egr1	65	644.333	119.333	3.3093	1.39e-86	1.4e-84	0.876485	0.00120193	0.00183932	1.54
Epha1	1	6.33333	51.3333	2.66297	0.0692543	0.118866	5.68182	1.1e-19	4.27e-19	2.4
Epha5	241.333	126.667	42.6667	-0.92999	1.89e-07	9.1e-07	-2.49985	2.48e-30	1.79e-29	1.9
Fabp7	9808	9988	2083	0.0262368	0.852743	1	-2.2353	2.71e-74	9.13e-73	1.24
Fgb	1	1	1	0	1	1	0	1	1	-1.93
Fgf8	1	1	1	0	1	1	0	1	1	5.08
Fgfr2	301	145.333	114.333	-1.0504	2.1e-08	1.12e-07	-1.39652	3.25e-12	8.21e-12	-2.21
Fst	137.667	296.333	119.333	1.10604	7.54e-11	8.46e-10	-0.206182	0.321943	0.387098	-2.54
Gad1	548	560.333	176.333	0.0321094	0.810265	0.985985	-1.63587	1.22e-17	4.39e-17	3.91
Gdpd4	135.333	113.333	31	-0.255945	0.212243	0.318923	-2.12618	2.65e-16	8.91e-16	-1.81
Greb1	50.3333	26.6667	338	-0.916477	0.00719023	0.0172908	2.74744	1.12e-42	1.88e-41	4.66
Hes6	626.333	355.667	288	-0.816405	1.45e-09	1.13e-08	-1.12086	3.52e-14	9.88e-14	-2.97
Il17rd	53	17.3333	126.333	-1.61244	1.02e-05	3.55e-05	1.25317	1.85e-07	3.65e-07	4.54
Irx1	66.3333	31	38.3333	-1.09747	0.000355968	0.00105743	-0.791135	0.0075315	0.0110244	-3.75
Jarid2	468.333	375	426.667	-0.320645	0.312503	0.444546	-0.134426	0.647945	0.752212	1.73
Lhfpl2	164	312.667	183	0.93093	1.39e-08	7.8e-08	0.158148	0.401457	0.471478	1.56
Lhpp	175.333	156.333	52.3333	-0.165475	0.371426	0.506946	-1.7443	8.86e-15	2.56e-14	1.66
Lmo1	274.667	254.667	334.667	-0.109072	0.492929	0.646569	0.285043	0.0740468	0.0997164	-2.96
Loc427799	38	83.3333	7.66667	1.13289	4.82e-05	0.000157019	-2.30933	7.72e-07	1.39e-06	2.72
Loc770996	1	1	1	0	1	1	0	1	1	-2.49
Lrrn1	296.333	167.333	64.3333	-0.824496	5.85e-07	2.46e-06	-2.20358	7.07e-29	4.2e-28	-1.85
Ltbp1	150	326.333	276.333	1.12138	9.89e-09	6.66e-08	0.881447	6.12e-07	1.12e-06	-1.86
Meis2	682.333	282.667	111	-1.27137	1.69e-18	2.84e-17	-2.61992	2.83e-42	4.08e-41	-1.77
Mllt3	89.3333	105.333	214.333	0.237692	0.294857	0.427213	1.26259	2.15e-10	5.05e-10	2.45
Moxd1	87.6667	99.3333	180.667	0.18025	0.437829	0.581852	1.04323	3.96e-07	7.54e-07	-2.13
Msgn1	1	1	1	0	1	1	0	1	1	3.09
Ndnf	108.667	71.6667	18.3333	-0.600535	0.00978916	0.0210363	-2.56737	1.08e-17	4.03e-17	2.66
Ndrg1	50.3333	71	24	0.496305	0.0720786	0.121332	-1.06848	0.00208598	0.00314454	-1.81
Nkx6-2	144.333	211	139	0.547838	0.00225226	0.00598628	-0.0543196	0.796622	0.893987	-2.62
Npm3	87.6667	101.333	254.333	0.209009	0.364298	0.504028	1.53662	2.05e-15	6.26e-15	1.64
Nr2f2	77.3333	30	5	-1.36613	4.27e-06	1.54e-05	-3.95109	5.76e-21	2.33e-20	-3.62
Nrcam	889.333	590.333	353	-0.591194	1.88e-06	7.29e-06	-1.33306	3.3e-21	1.39e-20	-2.13
Optc	1241.33	932.667	1199.67	-0.412457	0.000415054	0.00119773	-0.049257	0.6997	0.794041	-2.8
Padi3	1	1	1	0	1	1	0	1	1	2.48
Pax6	239.333	26.6667	102.333	-3.16591	7.79e-43	3.93e-41	-1.22575	1.41e-10	3.4e-10	-3.26
Pax7	246.333	115.333	207	-1.0948	1.13e-08	7.16e-08	-0.250981	0.146269	0.189399	NA
Pbx3	131	85	13.3333	-0.624032	0.00910943	0.0200011	-3.29646	3.22e-16	1.05e-15	-2.9
Penk	1	1.66667	1	0.736966	0.840772	1	0	1	1	-2.1
Phactr1	288.333	228.667	62	-0.334492	0.0350139	0.0642982	-2.2174	1.16e-28	6.15e-28	3.31
Pkdcc	57.6667	43	10.6667	-0.423401	0.159665	0.248095	-2.43463	4.37e-10	1e-09	-2.95
Plxna2	357.333	172.667	78	-1.04928	4.83e-07	2.12e-06	-2.19572	1.47e-16	5.1e-16	-2.32
Prdm12	73.3333	15.3333	1	-2.2578	0.000820624	0.00230231	-6.1964	4.93e-09	1.11e-08	-1.93
Prickle1	50	36.6667	248.667	-0.447459	0.165723	0.253607	2.31421	8.77e-28	4.43e-27	3.09
Ptn	6090.33	4262.67	899.333	-0.514765	7.8e-07	3.15e-06	-2.75959	7.42e-84	3.75e-82	-2.41
Ptpn3	253.333	195	138	-0.377563	0.0887818	0.144628	-0.876369	6.55e-05	0.000108481	1.56
Ptprz1	561.667	552.333	331	-0.024175	0.857678	1	-0.762883	2.23e-07	4.33e-07	-3.92
Pxdn	114.333	164	508	0.52045	0.00785481	0.0180304	2.15158	2.9e-37	2.93e-36	2.1
Rai14	107.333	473.333	473	2.14076	2.88e-39	9.7e-38	2.13974	1.08e-35	9.1e-35	2.46
Rarb	13.6667	17.3333	1	0.342888	0.54077	0.700228	-3.77259	8.2e-05	0.000133613	-1.82
Rasgrp3	8.33333	9	140	0.111031	0.949546	1	4.07039	3.44e-36	3.16e-35	4.81
Rbm24	123.667	82.6667	102	-0.581079	0.00826029	0.0185398	-0.277888	0.201181	0.247796	-1.72
Ret	378.333	489.333	92.3333	0.37116	0.0238909	0.0482596	-2.03473	2.83e-12	7.33e-12	-3.44
Rgs20	84.3333	88.6667	2.33333	0.0722889	0.774382	0.965588	-5.17564	8.09e-29	4.54e-28	2.12
Rtn4r	151.333	106	26.6667	-0.513666	0.0108624	0.0228564	-2.50462	5.52e-22	2.42e-21	-2.15
Sall1	335	524	528.667	0.645406	3.26e-06	1.22e-05	0.658197	8.68e-06	1.54e-05	1.38
Scml2	94	49	32	-0.939879	0.00290432	0.00752145	-1.55459	4.07e-05	6.98e-05	1.88
Serhl2	30	39	20	0.378512	0.296088	0.427213	-0.584963	0.16187	0.206948	1.58
Sfrp1	84.3333	137.333	175	0.703507	0.00101751	0.00277753	1.05318	4.25e-07	7.95e-07	-2.8
Sh3bp2	15.6667	34.6667	5.66667	1.14585	0.00646818	0.0159338	-1.46713	0.0242619	0.0350065	1.69
Slc1a3	8366	4472.33	1388	-0.90351	1.99e-11	2.87e-10	-2.59153	1.26e-48	2.55e-47	-2.92
Slc41a2	53.6667	43.6667	20	-0.297494	0.334803	0.469654	-1.42403	5.57e-05	9.37e-05	-2.19
Slit3	710	336.333	158	-1.07793	1.9e-10	1.74e-09	-2.16789	1.14e-24	5.23e-24	-2.25
Smarca2	87.6667	76.3333	59	-0.199715	0.415578	0.559645	-0.571313	0.0257216	0.0365899	1.71
Sostdc1	33.6667	32	10.6667	-0.073249	0.869225	1	-1.65821	0.000260807	0.000411586	1.28
Sox10	138.667	101	78	-0.457266	0.0273746	0.05317	-0.830075	0.000169987	0.000272519	-2.49
Spag6	244.667	476	780.333	0.960144	4.65e-11	5.86e-10	1.67327	9.55e-30	6.03e-29	-2.4
Spry2	100.667	121.333	87.3333	0.26939	0.214721	0.318923	-0.204982	0.382311	0.454276	4.84
St3gal1	48	47.3333	25	-0.0201779	0.973209	1	-0.941106	0.00699781	0.0103938	-2.28
T	15	13.3333	8.33333	-0.169925	0.798097	0.983022	-0.847997	0.168944	0.213292	2.78
Tfap2b	50.3333	32.3333	3.33333	-0.638492	0.052234	0.092555	-3.91648	7.7e-15	2.29e-14	-1.95
Tmeff2	357	283.333	58.3333	-0.333424	0.0253623	0.0502272	-2.61353	3.86e-41	4.87e-40	-1.83
Tspan7	2121	1869.33	538.333	-0.182221	0.096319	0.154416	-1.97817	6.34e-32	4.92e-31	-2.43
Tuba4a	12	11	3.33333	-0.125531	0.923105	1	-1.848	0.114819	0.150607	1.48
Unc5c	132.667	103.667	44.3333	-0.355854	0.088074	0.144628	-1.58134	1.13e-10	2.78e-10	-1.86
Wdr66	81.3333	108.333	173.667	0.413559	0.0694363	0.118866	1.0944	1.81e-07	3.65e-07	4.5
Wnt4	22.6667	7.66667	13.6667	-1.5639	0.00454666	0.0114803	-0.729911	0.174942	0.218137	-3.6
Wnt5a	83.6667	317.667	248.667	1.92479	2.23e-26	4.51e-25	1.57149	9.68e-16	3.05e-15	1.9
Wnt5b	55.6667	294	250	2.40093	1.61e-34	4.07e-33	2.16704	2.16e-25	1.04e-24	1.96
Wnt8a	20.3333	1	33.6667	-4.34577	2.91e-07	1.34e-06	0.727474	0.070082	0.0956524	4.25
Zic1	941.667	520.333	784.333	-0.85578	1.58e-10	1.59e-09	-0.26375	0.0455595	0.0639098	-6.07
