# Supplementary material for: Planar cell polarity-mediated induction of neural stem cell expansion during axolotl spinal cord regeneration
Source: eLife. 2015 Nov 14;4:e10230. doi: 10.7554/eLife.10230 (PMC4755742; doi:10.7554/eLife.10230)
Supplement: Supplementary file 1. — The numbers indicate the average length (in hours) of the total cell cycle (TC), G1 phase (TG1), S phase (TS), G2 phase (TG2), and M phase (M), extracted from the cumulative BrdU data using a modeling approach (see Materials and methods). Errors, 1σ confidence intervals. DOI: http://dx.doi.org/10.7554/eLife.10230.018 [file elife-10230-supp1.xlsx]

## Sheet: Sheet1
	Cell cycle parameters (hours)
	TC	TC_1σ	TG1	TG1_1σ	TS	TS_1σ	TG2	TG2_1σ	TM	TM_1σ
uninjured	324.032	20.9384	185.005	34.3552	130.027	13.4167	3.2817	2.52666	5.7183	2.52666
non-regenerating	339.849	32.3618	152.167	53.6149	178.683	21.2531	1.81531	2.9042	7.18469	2.9042
regenerating	118.573	10.2466	21.6972	18.899	87.8763	8.65247	5.3879	1.08285	3.6121	1.08285
