# Supplementary material for: Planar cell polarity-mediated induction of neural stem cell expansion during axolotl spinal cord regeneration
Source: eLife. 2015 Nov 14;4:e10230. doi: 10.7554/eLife.10230 (PMC4755742; doi:10.7554/eLife.10230)
Supplement: Supplementary file 2. — DOI: http://dx.doi.org/10.7554/eLife.10230.020 [file elife-10230-supp3.xlsx]

## Sheet: Sheet1
Primer name	Primer sequence (5'-3')
Prickle_kozak_Nhe1	TCCGCTAGCCGCCACCATGCCCCTGGTAATGGAGCCGGCG
Prickle1_T2A_Hd3Pml1	ACCGCACGTGAGCAAGCTTCCTCTGCCCTCGGAAATAATGCAGTTTTTTCCTTTGTGTCC
T2A_Hd3Pml1_Fw	AGAGGAAGCTTGCTCACGTGCGGTGACGTG
Rb_bGlob_pA_Sac1	5CTGGAGCTCGATCTTCATAAGAGAAGAGGG
Vangl2_fullFw1	GCTTCTAACACAATATTTTGAAGATGAT
Vangl2_fullRv1	AGAGACACACTGCAGTTTATGATTATTA
Vangl2_kozak_Xba1	TCCTCTAGACGCCACCATGGACACCGAGTCCCAATACTCT
Vangl2_stopER1	GCAGAATTCCTAAACAGACGTTTCAGATTGCAATCTCATA
