# Supplementary material for: Planar cell polarity-mediated induction of neural stem cell expansion during axolotl spinal cord regeneration
Source: eLife. 2015 Nov 14;4:e10230. doi: 10.7554/eLife.10230 (PMC4755742; doi:10.7554/eLife.10230)
Supplement: Supplementary file 3. — DOI: http://dx.doi.org/10.7554/eLife.10230.019 [file elife-10230-supp2.xlsx]

## Sheet: Sheet1
Gene name	Target sequence
Add3	CCATTCTGGTTTCAGCCCTCATGCAGCCATCTATTCTATGCGCCCAGATGTCAGATGTGCAATACACATTCATACTCCAGCAACTGCAGCGGTTTCATCA
Apod	CATGAAGAGATTTTATCTGATGGCACCGTTCGCAAAGCAGAAAGTGAAGCATATCCGTCCCAAGGGGTTGGAGCTGATCCAGCCAAAATGAGAATCAGTT
B3gat2	TCTCCCACCGTCGTTATCTGCTTAAGGAAGTCTGACTCTTGCATTCCTGGCTGTGATCCGCGCCGCTTAAAGACAGCCTTCGGGTTTGACAGAATCACTT
Bmpr1b	CACCCAGGCATACAGATTTAGTGGATGAAAGCATCCACAACATGGCCTTGCTGATCTCTGTGACTGTGTGCAGTGCTATCCTGGCCCTCATTCTGCTGTT
Cdx2	AAGCGCACAGGAGGGGAAGCAATGCATACGACTGGATAAGGAAGCCGACGCCGCAGTCAACAGGAGGATGCACCGTGAAAACCAGAACGAAGGACAAATA
Cdx4	CTACGGATGGTATTCACATAGTGCAGGTCTCGCCGGAGGCTGGCAAGAATAACCCTTACCAATGGATGGGGAAAACCGCCCAGTCCACTTCAGTAGGTAA
Chic1	CTTTCCATCAGTGTTGACAGGAAAGGTTGCACCAGAGGAATTCAAGACCAGCATTGGCCGTGTGAATGCATGTTTGAAAAAGAATCTGCCAGTCAATGTA
Chst15	AATGATATTTAGGAGGCTTGGACGGTTATTCAAGACCTCCAGATAGGGTGTAGGGGTCACTTAGAGCTTTGCACACTTTAAGGGCCCAACACGCGATGTA
Cited4	ATAAGTGCTTCAGTCTGTAGCGTACACAGAAAGACGTCCCGATGAATTAATCACAATGGAACGCTCACTTGTAATGCCTGCTCTGGCCTTTTTATAATCC
Cldn1	ACCAGAGCCCTGATGATTTCAGCCATCGTCGTTGGACTCATCGCCATATTTATTGCTGCCATGGGGATGAAATGCATCAAGAGCTTTGAAGATGAAAAGG
Cnot2	AAACCGCGTGGACGCTTAGAGACTCTTACAAAACAGACTTATCACCACAGCAGCAGGCTGTACCCTGTGCCCCGCGCACTATGCACTTTATTGTTTTCAT
Col14a1	CTCCTTCCTGGCTGTGATTGTACATTTCTCCAGCAGTGTGCACGGTCAAGAAACCCAGTTCACGTGCAAGACGCCGGCAATCGCGGATATTGTTATCCTG
Col5a1	GTGGAAACGAAGGACTTGGATAAAGGACTGGCCTCTCTTTGTAGCACTTTTCCTCTATGTTTTCTCCCAGTGCAATGCAGCTGAACCAGCTGATCTCTTG
Crabp1	GAGCTTGAACAAGGCTGAGACTCATCAACGATGAACGAAGGGTTACGATTAAGCAGTTGTCATTACAATAGTGACGGATGAAGTAGCTGCCTCCAGTATT
Crhbp	TACAAGTCTTCGCAGAACGTAGCAATGATTTTCTTCCGGGTCCAAGAGCCCGGGAATGGATTCACGCTAACCATCGGCAAAACGACTAACCTCTTCCCGT
Dach1	AAATGTTAAGAGTAAATGTTTGGGCTGTCGTTCAGCCTCAGCGCCAGCCACTGGAATCTTGTGCGTCGACATACAGACTGGTCCGATGAAGGCTTGAAGA
Dbx2	GTTTCAAAACCGAAGGATGAAGTGGCGAAATTCTAAGGAAAAGGAGGTGTTTTCATATAAGTGCACACTCGAAGACGATATCCAGGAGCAAGACCTCACC
Dhrs3	AGATCATTTTATGGGGTCGGACTGAGAAGTGCCTAAAAGAAACCTGCGAAGAGGTCAAGATGATGGGCACGGAGTGTCACTACTTTATATGTGATGTGGG
Dlg1	TTACGGGTTAATGACTGTATATTACGAGTAAACGATGTGGATGTGCGGGACGTGACGCACAGTAAAGCAGTGGAAGCATTAAAAGAAGCAGGATCCATTG
Dusp4	AACTTGGGCACAACCACTCCACACCTATGCCCTTTTGTTTTGGAAATGAACCAGAATGAATCTCCAAGGTGCATAAGCAATAAGAGGGTGGTCAGATAAT
Efemp1	TCCACTTCAAAATGCACAGGTGTTATAAAGTTGGTGGCGGTTGGTAGTCGTCCCTTTGTCATTCCCGTAGCGAGCCAATGGAAGCAGAGCAGTGACCTGC
Egr1	TGATCAGCAGGCTCAGTCTTTCTCCAGTGCTTCTGGAACTTCCCTTCAGTACCCTCCACCAGCGTATCCCGCATCCAAAACTAACTTCCAAGTTTCAATG
Epha1	CCATCAAGACCTTGAAGACAACGTACTCTGACTCGCAATGGTGGAACTTCCTTCGTGAGGCCACAATCATGGGACAGTTCGGCCATCAGAATATTGTGCG
Epha5	AGCAGCCTGAAGACACTGGTGAATGCATCAAACAGAGTGTCAAATCTATTAGTAGAACATAACACCTTTGGGATCTGCGCATACAGGTCTGTGAGTGAAT
Fabp7	GCAGAAATGGGACGGCAAGGAGACCTCCTTTGTTAGAGAAATTAAAGATGGCAAAATGACAATGACATTAACTTTTGGTGACGTGATTGCTGCCCGCCAT
Fgb	AAACTTTCCCATTCCTCCGACATGATCTACAACTACGTGACTGTGCTGGAGAAGACCGTCAAGCAAAGGGAGAAGCTAGTAAAAGATAATGCCGATGTTG
Fgf8	CGCCCGGGGTTAAAAGGCAAGAGACTCTAAATGAAGAAAAGGACATATTATTTCTAGCGATCCAGAAAAGCGAACTTTCAGCTTCACGTGCCTCACCTCC
Fgfr2	CGCCGAGTGGAATCTTCGTCCTCCGACTACATGGAGATCGCCATCTACTGCTTCGGGGTCTTCTTGATCGTCTGCATGATCTTCATCGGGATCGCGTGCC
Fst	CCCGGGCAGCTCTACCTGTGTGGTGGATCAAATTAATAATGCGTATTGCGTGACGTGTAATCGGATCTGTCCAGAGCCAACAAGTCCAGAAATGTACCTC
Gad1	TGCACCAGTTTTCGTCTTGATGGAACAAATCACTCTACGCAAGATGAGGGAAATTGTTGGATGGTCGAATAAAGAAGGGGATGGAATATTTTCACCGGGG
Gdpd4	GGCGCCATTTCAGCTATGACCCTCATGTCTTGGCCAGTGGCTCTTTACTTTGTGAGAACGAGCAGGAAAGTTTGTCAGGTGATAATTCTTGGACCATTCC
Greb1	CATGGATCCTGTCCAAACCTAGGGTGTTAAACTGGTTCTGCTCAGTCTCACAGGGATGGATGTTTCATAGCCAGGGAATAACCCTGGTAGTAGAACTCTT
Hes6	TCTGGTAAGGACAACATAAGTGTGATGGGTGGTTCCTTCAATTTTGGAGGTAATAAGCGCCCTAACTTCGTGCTTTTAGATGGCTCGTGCTGTATGGCAT
Il17rd	GTAGTGCTGCAGTCGTCGCGGCGCTTCGCACCATGGCACCTTGGTTGGATTTCAGGTCGTCGCTCCTCGCGCTGAGTTTGTGGGGATTCTGGTTCGGCAT
Irx1	CAGATTGGCAAGTTTCACAACTGGACAAATGGCGCTTTCCTGGCCCAGAGCTCGCTTTTGAACGTGAGGTCGTTGTTGGGAGTCAATCACCACCACGGCG
Jarid2	CACCACATGCTTCACAAATCGGCTCAGGACTTAAGAAAACAGGTGTCTAAATTGAATGGAATCACTCGGATGTCATCTTCGAGCGCCAATGCAGCCAGTG
Lhfpl2	TTCCGCCAGCCACCAGTAGCTTGTCTGTTCATTCGAGTTATGCTGCAAGTAATCTCATAAGGGAATGGCGCTGGTGCGTTTCTTACCACTGACTGCATAA
Lhpp	CGGTACCACTCCATACACAGAGCACACGTTTCGGAAAACCTTTTACAGACCCAATACTTGAGAACCAAGCACCTCTAACAGAACCAACCCTTCATCTCTC
Lmo1	AGCAAAGAAGCGTCGCCGATCCCTCTTCTGCAAATTGCAGTTTGACTTCCTCGTTATTCCACGCAACAAAAGTAGGCGACACGGCGTTTGGAGCAGCAAA
Loc427799	TCATGTGTGCCGTGGGGGTTGCTGGTAATATGTATACTCTGGTGGTGATGTGCCACTCCATGCGCTCAGCTGCTTCCATGTATATCTACATTATCAGCCT
Loc770996	CAGAAGACACTGCAGGAAAAATACATTACCTCTTCCTGTTTACCTGAGACCCTGATAGGAACAGAAAAATGGTTCTGGGCCGTGGAGGTTTCAAGTTCCA
Lrrn1	ATCTCTCTGTAGATACGCAAGTTCTACTTCTCCAGAGCAACAACATCGCCCAGACGTCGGATGAGCTCCAGCGCCTCTTCAACTTAACCGAGTTGGACTT
Ltbp1	CCGTAACAGGCCAGCATCAAGAGGTTAAAGTGAAATTGCCTCCAAGCATGGTCAACATCCACGTAAAGCACCCTCCCGAAGCCTCGGTCATGTTCCATCA
Meis2	GAGGATATCGCGGTCTTTGCCAAACAGGTTCGAGCGGAAAAGCCACTTTTTTCTTCAAACCCAGAATTGGACAATTTGATGATCCAGGCGATCCAGGTGC
Mllt3	ACTCCATAGAAGATTAATGACTCTTCGAGAACGACATGTGCTCCAACAGATTGTGAATCTTATTGAGGAAACTGGACACTTCCATATCACCAACACGACC
Moxd1	AATGACGTGCCCGTACCATATAAGGATACAACATACTGGTGCCAGATGTTCAAGATGCCTATGCTGCACAAAAAACATCATATTATTAAGGTGGAGCCGC
Msgn1	TTGTGCTGTAAGTTTAATAAAATGCTGACGCTTGAGGGTAGTGACGGAAGTTGCCCAGCAACGTCCGAGAGCCATGCCGCCTTATTCCGTTTTTTCGGAA
Ndnf	GCTTTTTCATGACTCTTCAGTCATCCCGGATGGAGCTGAAATCAGCAGCTATCTATTCCGAGACAACCCGAAAAGGTATTTCTTTGTGGTGGAAGAAGAC
Ndrg1	CATAGTGGAAGAGGGAATCAGTGTTGTCTATCCAGAGCTTGAAATTAAGGAGCAAGATATTGAGACTGCACATGGAATCATTCATGTTACAATGTGCGGC
Nkx6-2	TCCCGCCCAGAGCGGCATGGTACTCGACAAGGACGGCAAGAAGAAGCACTCGCGCCCAACCTTCTCGGGGCAGCAGATTTTCGCCTTGGAGAAAACCTTC
Npm3	TGTTTGCGAGCATATTCTAACAATGCGGCTGATTTCTCTTGGCGATGGGGTAAAAGATGAATGCAATGTTATAGAGGTGGTTTGTCTGGATCGCGACCGC
Nr2f2	GGGGATTCCAGTTTAGAGCGACGATGCAAGCCATGTGGGACGCGGAGCAAGGAAAATATGTGTTTGCCGTCCAGCGGGGCAGAATGCCACCCACACAGCC
Nrcam	AGGGATCGCCCAAAAACATTTCCAGGTTAATAGTTAAGCCTGTCAAGAAGACACTTGGAGTTGCCATCACCTGGCGCAGATGACTCTCTAAGTTCAATTC
Optc	CATTCTGGAGAACTATGACCTAAACCTGGACAACTATGGCGAAGTCATCGACTTGAGCAACTATGAAGACTTATATGATTACGGAGACCCTGGGTCAAAG
Padi3	CCGAGGGCTGAAGGACTTCCCTTTCACAAAGATCCTGGGACCCGATTTTGGCTACTCCACAAGAGAACCAATCAATGAATTTGACGTTACCGCAATGGAC
Pax6	CGGCACTTATGAGGAGGGAAGATTTTAACTAGCGACAAGCAGATGCGTGAGCCCTTAAATTGCATGCCAAGAGAGCCACTCCGCATTTCAGGACTATATA
Pax7	GATTGCCCAGAGGACATCATTCAAAGGCCACCTACCACTTTCACGCTTAACCTCCAGCGACAACCAAGTGTATGGCAGCCAGTATCTACATAGTGTGTAT
Pbx3	CGCAGCCGTGCAGAATAACCAGACAAACTCGCCCACGACGCCAAATTCTGGTTCTTCTGGTTCTTTTAACCTTCCAAATTCTGGGGACATGTTCATGGCC
Penk	AGTGAATGGTAGTGGAGTAAAATGTCGAGACAATAAGAGGAGGGCTGAATGAGTGGATTGCTAATACATTGAGTAAGTAGGGGGTTGATGCGTCAGTGAT
Phactr1	TTGGATTGACAACTAGGACCAGGCACTTACGGCACTTAACCTTCTCAACAGCAGCAGCGGCTTTCTTGAACAAATGTCTATCGATCAACACCTTACCAGA
Pkdcc	ACGTGTTGCATTTATACAAGAGTGGTCTATATCTCGGAAACACTACGCGGACTCAAAAATCAGAGTTCAGACGGGTGCCTGAAGTTTCTATTCCTGACGA
Plxna2	GATTCCCTCTGACACGCTGGCATTGGTCTCTCACTTTGACATCTTCTACATCTATGGTTTTGCTAGCGGCAATTTCGTCTACTTCCTGACCGTCCAGCCC
Prdm12	CCCGAGCAAGTCTCACCCAGATGCTTTTCAAGGCTTTCCTTAAAGGTGGGCAGAGAACGCTGCCAAGAAGTGTGCAGCCATAAGAAAGAACCATATTGGC
Prickle1	CATGAAGCATTTTTGCTGCTTTGAGTGCGAGACTGTCCTCGGCGGCCAGCGATACATCATGAAGGATGGGCGGCCGTTCTGTTGTGGGTGCTTCGAGTCT
Ptn	CACAACTCACAAGTCATTCTCTGATGTCAGCGTTGGAGGAACACATTCACACATGTTGTGTTGGAACACTCTAAACTCAAACAGCTCGTGCATACCTGTT
Ptpn3	AGTTTTCAACCACCTGGGTGTAACGGAGCGGGAATATTTTGGATTACAGCAGAGTGATGATTCGTTAGATGCTCCTAAATGGCTTGAAGCAAGCAAACCT
Ptprz1	GAAACAGTTTGCAGTTCGGAAGCAGAGAATGTCCAAGCTGATCCAAAGAACTACAGCAGCCTTCTTGTCACCTGGGACCGTCCTCGAGTCGTGTACGATG
Pxdn	AAGAACGTAGCAGGAGAAGTAAAAACTCACGAGGTTACCCTACGATACTTTGGTTCACCAGCTAGGCCTGTATTTGTAATTCAGCCACAAAACACAGAAG
Rai14	AAGCTTCTTCAGTTTAAGTGCCCAGCAGAATGTACGGACAGCACCGGAAAGACCGCTTTACATCACGCAGCTTCAAGCGGCTGCCTTCCAATAGTTCAGC
Rarb	TTGACCTTGGACTCTGGGACAAATTTAGCGAGCTGGCGACTAAGTGCATTATTAAGATTGTAGAGTTTGCTAAGCGATTACCCGGCTTCACCAGCCTGAC
Rasgrp3	GCTGTTTGATCACCTTGAGCCGATAGAGCTGGCAGAACACCTGACTTTTCTTGAACACAAAGCCTTCAGGAGGATTTCGTTCACAGATTACCAAAGCTAC
Rbm24	CAACCCTATTATTGATGGCAGGAAAGCCAATGTGAATCTTGCGTACCTGGGGGCAAAGCCACGTATAATGCAGCCGGGTTTTGCTTTTGGTGTTCAGCAG
Ret	CCCGCTCTGTTCTGGCAGTTAAAACTTAAAGTTATTGTCTTGCCCAGGCCCTTCCAGGAAACAGACTGTTCTCTGGACCCTTCGGCCATGGTTACTCTCA
Rgs20	ACTGAAAAAAAGGTTCTATATGTGGGACAAAGTTTAGAGCTGAGCGGGTCTTCACCTGGACAGTCCTCTCAGGCACATTTTACTATGGACAGTGGCCTTT
Rlp4	CCCTTGATATCTGTGTACTCCGAAAAGGGGGAAGTATCTGGAAAAAATGTTACCTTGCCTGCTGTGTTCAAGGCTCCCATTCGCCCAGACATTGTGAACT
Rtn4r	ACTGTGTTGATTATTGGAGATTGCTGTGCACCTCGGCTCTTGCGACGAGGCGGACGCTCTGCGAAGGAATATGATGTCAATGAAGCCCAGTTGAAACAAA
Sall1	GTGACGTTATCACAGATCACACAGTCTGCGGTGACCTTTCCGAGCATAAGGAACTTGCCAAGGAGGAATCTATGGACGTTGAGGTCTCCAGCATCAACAG
Scml2	TCGAAGAGCTTATCAAGTACACCAGTGTCTCCTGCCAAACCGATCCGTAGTTCAATGCAGTCACCACCAAAGCCTGCTTTAGTTCATGTTCAGCGGGTGA
Serhl2	CAAGGGCTCTCGCTATGACTTCAATAACTACATGATTGAGGTGTGCCGGGCTGTGCAAGCTCTGAACTACTGCCAAGTTTCCATCATCGGGCATAGTATG
Sfrp1	GACCTACGAGTGTCCGACATTTCAGTCCGTATTCAAATAAGCAGCAGGCGCTGCTGATCAACGAACTTGCACAGCTCCCAGCCTTATCCCTAGAAGTCTT
Sh3bp2	CTGCAGCTTCTAAGGTGGCCTCTGAGGTTTGTGATAATACACAAGGGATGTGTGTACTACTTCAAGAGTAGCACGTCCGCCTACTCGCAAGGCGCTTTCT
Slc1a3	GCAAGATGGGCCTCCGTGCTGTGGTTTACTACATGACAACGACGGTTATCGCTGTGTTTATCGGGATAGTGATTGTGATCATCGTTCACCCTGGCAAGGG
Slc41a2	CGACTGATGCCCAGGATACTGATGTCAAATAGTTGCAGTCCTTCTGCACCCAGAGTTAAAGTGAAGCTGCTTATTTTGGCTGATAAGGGAGTCTGCTCAA
Slit3	CTTGTGCCGAAGGAGCTCTCTGGCTTCAAACACCTGACACTCGTTGACTTGAGTAATAACAGCATCAGTGTACTGGCCAATCACACGTTCAGCAACATGA
Smarca2	GAACGGAAGGCTTTTCTACAGGCTATATTGGAGCACGAAGAACAGAATGAGAGCCAAAAGAAAGATGACCTTTCAGGAGATAATTCACAAGAAGGTGCAA
Sostdc1	CAATTCAGACTTAACAGGGTCCAGTACTCTTTCCTCATCCAGCCAGAGACCTGATAACTTCTTCTCAGGACAGGGAGGTCTGCAACCACAAAACCTTCTT
Sox10	CCAATGTGACTTAAGAGGGTGTAGGGTGTGAAGCAGGTGGATTATCAAGACATGGGTTCTCCTCACTTCCATGCGGGAATCACGCTCTAGAACATGTGTG
Spag6	CGTGCCACTCATCTAGAACTCGCCAATGCCAGTGATCTACAGAGAGCCTGCAAGCCCTGGTGATCTCCACACATCTCGCCAACACCGGCTATATCTCTAG
Spry2	TTGTGCCGCCGTGGATCCTTCTGTACACACGCCGCTCTCAGCTTTTTTCTTTTTCTTGCTCCGGATGGATTACATGTGGGACTGAACTGCAGCTTGGGAA
St3gal1	CTTCTGCTTCTGTGATTGGTGGCAGCAAGGCTCCTCTCGCCTGTGGATAAGTGGATCAGATGCTAAGGTCAAGTCAGTGGTTGCTCAATTGATCCCAAGA
T	CCAATACAACCCATTTGCGAAGGCTTTCCTCGACGCAAAAGAAAGGACAGATCACAAGGACATATTGGAAGACATGGTGGAAAATCAATCCGGCTACTCG
Tfap2b	CGTGGACGAGCTGAATAATGGCATGAATCTGCTGGACCAGTCTGTCATTAAGAAAGTTCCGGTTCCGTCCAAGTCGGTGACGTCGCTGATGATGAATAAA
Tmeff2	TGCGATTGCCTGGGTTCCCTGGTGCTCACCGCAATGTTGCTCATCATTGCCAGACCGGTTAAACTTGCAGCTTTCCCTACCTCCCTAAGTGACTGCCAAA
Tspan7	GTCTTCCGCCATGAGATCAAGGACACTTTTCTCCGGACGTATACTGAAGCGATTCACAATTACAACGGGAAGGATCACGCAAGCATTGCGGTGGATGATA
Tuba4a	GCATGGAGGAAGGGGAGTTTGCCGAAGCCCGGGAAGATCTGGCTGCCTTGGAGAAGGACTACGAAGAAGTGGGCACAGACTCCTTTGAGGATGAAAATGA
Unc5c	CGGTGGACCTTTCTCGCCTGGCACAATCAGTTGGTGGCTGGACACCTTTTTTTGCGGCGCATCAAATCGACAAAAGCGGCGTTACCGAGTGCTTTATGAA
Wdr66	TGTTGCCATTGCTCTGTCCCATAATGCAATGTATATGGCCACAGTCGGTGGTGGAAAAGAACAGAGAGTTTCAATCTGGAACTGGACATCGGTCGACGAA
Wnt4	TTATTTCTGAGGAACAATGATGCGAGGGACAGTTCGACAGAGCTGTGATTGGTGGAACTCACTTGTTTGACGTTATTGCTGCTGCTTCGGGGACAGAGAT
Wnt5a	ATGAGGCTGAACGCCCGGGGTAAGCTGGTGCAGGTGAACAGCCGCTTCAACCCGCCCACCACGAACGATCTGGTGTATGTGGACACGAGCCCAGACTACT
Wnt5b	CGCTGGAACTGCAGCACAGTGGACAACACCTCGGTCTTTGGCCGAGTTATGCAGATAGGCAGTCGAGAGACGGCGTTCACTTACGCAGTCAGTGCGGCGG
Wnt8a	GAAAAACACCAAACTTTTTGCCCTCACCACCCTGGGAGTTTTCTGCACCATCTTCACCGCATCAGCATGGTCTGTGAACAACTTCCTCATGACTGGTCCA
Zic1	TTGTCCCAAAGTCCAGTCTGAGTAGTGCTGTGAAATGTTGTTACACGTCCTGTCGAGAATTCGTGTAGTGCAAGCCTGGAACTGCGTGTCAAACTGTTAT
