# Supplementary figures and images for: Planar cell polarity-mediated induction of neural stem cell expansion during axolotl spinal cord regeneration
Source: eLife journal article supplement (doi:10.7554/elife.10230), 2015-11-14

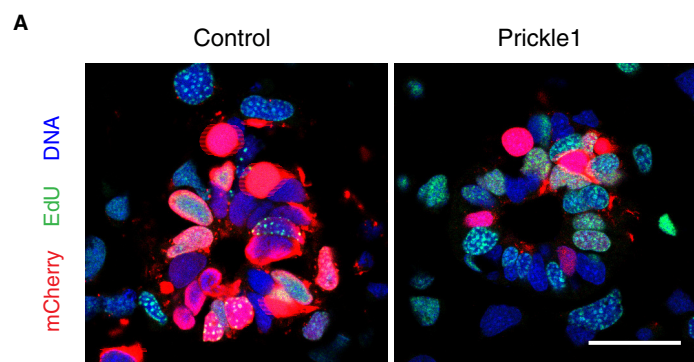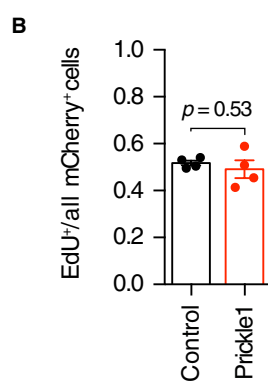

Supplement: supp [file elife-10230-supp-v1.zip]

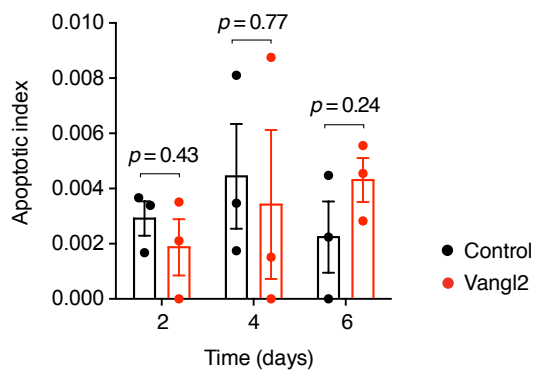

Supplement: supp [file elife-10230-supp-v1.zip]

**A**

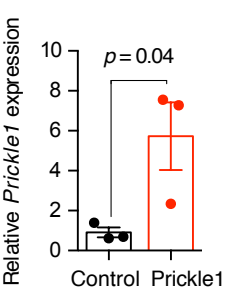

**B**

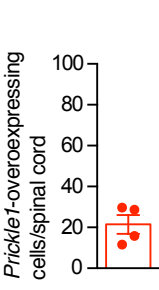

Supplement: supp [file elife-10230-supp-v1.zip]
